1 **Practices and trends in last-mile delivery of poultry vaccines in rural areas in**  
2 **developing countries: the case of Newcastle disease vaccine delivery in Bungoma**  
3 **County, Kenya.**

4 Chemuliti, JK<sup>1\*</sup>, Ogolla, KO<sup>1.</sup>, Mbogoh, SG<sup>2.</sup>, Mochabo, KM<sup>3.</sup>, Kibore, BK<sup>4</sup>

5

6 <sup>1</sup>Kenya Agricultural and Livestock Research Organization; Biotechnology Research  
7 Institute, Kikuyu, Kenya.

8

9 <sup>2</sup>University of Nairobi, College of Agriculture and Veterinary Services, Kangemi, Nairobi,  
10 Kenya.

11

12 <sup>3</sup>Egerton University, Egerton, Kenya.

13

14 <sup>4</sup>Kenya Veterinary Vaccine and Production Institute, Nairobi, Kenya.

15

16 \* Corresponding author

17 Email: [chemuliti@gmail.com](mailto:chemuliti@gmail.com)

18

19

## 20 **Abstract**

21 Newcastle disease (ND) is the single most important infection of village chicken in  
22 smallholder farming systems in developing countries. Vaccines for ND control are  
23 available but the delivery of safe and potent vaccines in resource-poor settings remains  
24 a big challenge due to difficulties in the maintenance of cold chain. This paper reports the  
25 results of a study that was carried out in Kenya to assess the storage and handling  
26 practices of Newcastle disease vaccines by agro-veterinary shops (agro-shops) during  
27 acquisition, storage, and sale to smallholders' farmers. Data were collected from one  
28 hundred and thirty-two agro-shops using semi-structured questionnaires, observation  
29 sheets and actual purchase of vaccines over the counter. The results showed that the  
30 majority (82 percent) of the agro-shops had a domestic refrigerator that was connected  
31 to the electricity grid but many (61 percent) did not have power backup. Sixty percent of  
32 them only stocked thermolabile vaccines. Recurrent power outages (62 percent), high  
33 cost of electricity (62 percent), and long-distance to vaccine sources (33 percent) were  
34 the most common challenges in vaccine storage and sale. Some agro-shops switched  
35 refrigerators on and off while others removed vaccines from refrigerators for overnight  
36 stay in cool boxes to minimize electricity costs. In some cases, the sale of vaccines was  
37 restricted to market days and late afternoon when ambient temperatures were lower to  
38 minimize vaccines storage time and vaccine spoilage respectively. Thermostable  
39 vaccines were not stored as recommended by the manufacturer and few agro-shops (23  
40 percent) sold reconstituted vaccines. Most shops adequately packaged thermolabile  
41 vaccines in improvised materials during sale. Overall, most of the ND vaccine handling  
42 and storage practices in the last mile appeared to aim at safeguarding the safety and

43 potency of vaccines, but further research could elucidate the effects of these practices on  
44 the quality and potency of ND vaccines.

## 45 **Introduction**

46 Newcastle disease (ND) is the single most important infection of village chickens in  
47 smallholder farming systems in developing countries (1,2). The disease causes high  
48 morbidity and mortality in chickens, thus denying farmers access to income and a cheap  
49 and readily available source of animal protein that would contribute to improvements in  
50 livelihoods. Vaccines for the control of ND have been developed and are widely available  
51 (3,4). It has been empirically demonstrated that these vaccines are effective in reducing  
52 morbidity and mortality in chickens and can result in increases in flock sizes and egg  
53 production with significant benefits of enhanced income and nutrition to smallholder  
54 farmers (2,5–9). However, despite these benefits, the use of poultry vaccines in  
55 indigenous poultry is not widespread and remains low in many parts of sub-Saharan  
56 Africa. The constraints that hinder the adoption of ND vaccines among smallholder  
57 chicken producers have been well enumerated in the empirical literature. Among these,  
58 vaccine inaccessibility remains existential due to the lack of cost-effective and efficient  
59 vaccine delivery systems in many rural areas (7,10,11). With the development and  
60 availability of avirulent thermostable ND vaccines that are less sensitive to cold chains, it  
61 was anticipated that vaccine accessibility and utilization among smallholder farmers in  
62 rural areas would increase. Initial studies conducted in some parts of Africa showed that  
63 the vaccine was effective in controlling the ND, thus leading to improvements in chicken  
64 production, food security, and women's economic status (12,13). However, a recent study

65 in Tanzania showed that the thermostability of ND vaccines was not a major consideration  
66 that influenced the purchase decision of the vaccines among smallholder farmers (9).

67 Several interventions aimed at enhancing the accessibility of poultry vaccines among  
68 smallholder farmers have been introduced in many parts of sub-Saharan Africa (14–16).

69 A major focus of such initiatives has been on the last-mile delivery of vaccines leveraging  
70 community-based vaccinators to drive improvements in vaccine coverage. Relatively less  
71 attention has been directed at the integrity of vaccines at points of sale, commonly the  
72 agro-veterinary shops (hereinafter referred to as agro-shops) that stock and sell vaccines  
73 to farmers. These agro-shops some of which are located in small towns in rural areas  
74 serve as the end of the cold chain where vaccines are stored before they are sold to  
75 farmers. While efforts to increase the accessibility of vaccines to smallholder farmers are  
76 important, equally important but often overlooked is the storage and handling of the  
77 vaccines in these shops which influences their quality and potency. Agro-shops are a  
78 critical node in the vaccine supply chain. Vaccines that reach farmers must be potent and  
79 able to offer protection to chickens. Understanding how these agro-shops handle  
80 vaccines during acquisition, storage and sale to farmers is therefore important in  
81 informing strategies and interventions that are aimed at enhancing the integrity of  
82 vaccines thereby contributing to effective control of poultry diseases.

83 Veterinary vaccines have to be handled with care from production through distribution  
84 and storage until they are applied to target animals (17). This is essential in order to obtain  
85 optimal potency of vaccine and maximal results from a vaccination. The maintenance of  
86 the cold chain during acquisition, transport and storage by the vaccine handlers has been  
87 shown to be critically important (18,19). One of the major challenges in the distribution of

88 vaccines in rural areas in developing countries is the limited coverage and reliability of  
89 electricity and lack of functional cold chain systems. Ensuring vaccine storage under cold  
90 temperatures in these resource-poor settings is not easy because cold chain equipment  
91 is often unreliable due to equipment failures, power outages and an unreliable electricity  
92 grid (20,21). Moreover, preventive maintenance to avoid equipment failures is rarely  
93 executed. Spare parts are often not available and where they are, repair of cold chain  
94 equipment can take several months (22–24). As a result, vaccines are often exposed to  
95 either heat or freezing, making part of them unusable and resulting in vaccine wastage or  
96 impaired vaccine efficacy (25–27).

97 The quality of vaccines is one of the important factors in the successful control of poultry  
98 diseases which in turn depends on the proper storage and handling of vaccines. If a  
99 vaccine is stored outside the recommended temperature for a considerable time, its  
100 potency will be adversely affected thereby reducing protection from vaccine-preventable  
101 diseases. Available evidence shows that farmers prefer and prioritize ND vaccination  
102 programs that have a high capacity to protect birds from mortality (28) and this invariably  
103 depends on the quality of the vaccine.

104 This paper reports the results of a study that was carried out to assess the vaccine  
105 handling practices during the acquisition, storage and sale of Newcastle disease vaccines  
106 by agro-veterinary shops in Bungoma County of Kenya. This Newcastle vaccine delivery  
107 study was part of a larger study whose objective was to determine how the productivity  
108 and market access of indigenous poultry producers in Bungoma County can be improved.  
109 This paper thus adds to the growing body of knowledge on vaccine delivery and use  
110 among smallholder farmers in developing countries. It is anticipated that the information

111 provided by this paper will inform efforts aimed at improving the delivery of quality poultry  
112 vaccines to smallholder farmers.

## 113 **Materials and methods**

### 114 **Description of the study site**

115 Bungoma County is located on the western side of Kenya and lies between latitude 00  
116 28' and latitude 10 30' North of the Equator, and longitude 340 20' East and 350 15' East.  
117 It covers an estimated area of about 3,032 km<sup>2</sup>. The altitude ranges from 1200 to 4321  
118 meters above sea level. The annual rainfall is approximately between 400 mm and 1800  
119 mm and occurs in two seasons: long rains - March to July and short rains - August to  
120 October. The annual temperatures range from 0°C to 32°C. The county is divided into  
121 nine sub-counties with a total human population of 1,670,570 persons which roughly  
122 translates to a population density of about 552.5 persons per sq. km. (29). The total  
123 number of households in the County is about 358,796 with an average household size of  
124 4.6 members. Indigenous chicken production is an important source of livelihood for the  
125 majority of households in the County, chicken being the second most important livestock  
126 species after cattle and with an estimated value of 596 million. The majority of the  
127 chickens are of the indigenous ecotypes and are kept under a free-range system with  
128 minimal inputs. The smallholder indigenous chicken production has been a major focus  
129 for livelihood improvement through various development initiatives in the county. Kitale  
130 town which is located in the neighboring Trans Nzoia County was included in the survey  
131 because a preceding baseline survey had shown it was a major source of poultry vaccines  
132 in Bungoma County.

## 133 **Data collection**

134 Data were collected from agro-shops in Bungoma county and Kitale town which is located  
135 in the neighboring Trans Nzoia county. All towns and the major trading and market centers  
136 in Bungoma County were visited and those that stocked poultry vaccines were delineated  
137 and sampled. Data was collected from the agro-shops using a semi-structured  
138 questionnaire that was administered to the shop owner or shop attendant after informed  
139 consent was sought and obtained. The questionnaire was designed to capture the socio-  
140 economic characteristics of the shop owner, cold chain equipment, vaccine sources and  
141 brands, and challenges of cold storage. An observation sheet was used to collect data on  
142 vaccine packaging and handling practices through making an actual purchase by using  
143 enumerators who posed as smallholder farmers. For each vaccine that was procured, the  
144 cost, brand, Newcastle disease strain, expiry date and adequacy of packaging materials  
145 were noted and recorded. In this study, a vaccine vial was regarded as adequately packed  
146 if it was wrapped together with a sufficient block of ice in non-absorbent packaging  
147 material and protected from direct sunlight. Directions on vaccine use were also sought  
148 and recorded. All shops were georeferenced. This study was internally approved by the  
149 Kenya Agricultural and Research Organization (Ref No. KALRO/1/071).

## 150 **Data management and analysis**

151 The collected data was entered in a Microsoft<sup>®</sup> Excel 2016 spreadsheet. The data was  
152 then cleaned by checking for missing and incorrect entries, coded and exported to  
153 Statistical Package for Social Sciences<sup>®</sup> (SPSS version 21) software for analysis.  
154 Frequencies, descriptive statistics, cross-tabulations and association tests were then

155 carried out. The level of significance for statistical analysis was set at a p-value equal to  
156 or less than 0.05.

## 157 **Results**

### 158 **Profile of agro-veterinary shops**

159 One hundred and thirty-two (132) agro-shops were visited and mapped. The majority (74  
160 percent), were located in Bungoma County. Of these, less than a half (39 percent) stocked  
161 ND vaccines. The questionnaire response rate among the vaccine stockists was 82  
162 percent. The majority (67 percent) of the agro-shops had been in operation for more than  
163 5 years, while 22 percent of them between 3 to 5 years and the remaining 12 percent in  
164 less than 3 years. Among the vaccine sellers, 25 percent were wholesalers of poultry  
165 vaccines to smaller agro-shops. Fig 1 shows the distribution of the agro-veterinary shops  
166 in the study sites.

### 167 **Fig 1. Map of Bungoma showing sampled agro-veterinary shops, towns and** 168 **trading Centres**

169

170 The number and proportion of vaccine stockists were directly related to the proximity to  
171 Bungoma town which is the largest poultry market and administrative Centre of Bungoma  
172 County. Many (76.5 percent) of the respondents had training in an animal health-related  
173 course which is a regulatory requirement of all agro-shops operating in Kenya.

### 174 **Characteristics and sources of Newcastle disease vaccines**

175 The agro-shops stocked both thermotolerant and thermolabile Newcastle disease  
176 vaccines from different local and international manufacturers. These vaccines included



177 the Lentogenic Lasota strain, F strain, F58 strain and I-2 in freeze-dried tablet and liquid  
178 forms. In Kenya, poultry vaccines are mostly supplied by importers and local  
179 manufacturers who are located in and around Nairobi, the capital city of Kenya. The  
180 vaccines are then distributed to wholesalers and retailers in different parts of the country  
181 from where they are sold to a variety of clientele that includes small agro-shops, farmers  
182 and animal health service providers. The majority (60 percent) of the agro-shops only  
183 stocked thermolabile vaccines, while 15 percent stocked both thermostable and  
184 thermolabile types and the remaining 25 percent stocked only the thermostable types.  
185 The 100-dose thermolabile ND vaccine vial was the most (81 percent) common dose  
186 package and the 25-dose thermostable ND vaccine in a plastic dropper the least (14  
187 percent) common package. The main customers for the ND vaccines were, in order of  
188 decreasing frequency, smallholder farmers (92.3%), veterinarians/animal health  
189 assistants (50%), commercial chicken farmers (48.1%) and community vaccinators  
190 (21.6%).

191 Fifty-two (52) samples of ND vaccines were procured by enumerators who posed as  
192 chicken farmers. These comprised thermolabile freeze-dried forms in small glass vials  
193 (69 percent), thermostable liquid forms in plastic droppers (10 percent) and reconstituted  
194 vaccines (21 percent). The labels on the procured vaccine vials showed that they were  
195 manufactured in India (71 percent), Spain (17 percent) and locally in Kenya (12 percent).  
196 All vaccine vials in plastic droppers were manufactured in Kenya. The product labels on  
197 all the procured vaccines showed that they required storage temperatures of between  
198 +2°C and + 8°C. The average cost of a 100-dose vial was KES 259 (range 220-320). Two  
199 of the vaccine vials were found to be beyond their expiry dates.

## 200 **Cold chain infrastructure and vaccine storage practices**

201 The majority (94 percent) of the sampled agro-shops that stocked vaccines had cold chain  
202 equipment that was connected to the electricity grid. Eighty-two percent of the vaccine  
203 stockists had a domestic refrigerator with a freezer compartment in single or double door  
204 styles for vaccine storage, 10 percent had both a refrigerator and a standalone freezer, 6  
205 percent had only a standalone freezer and another 6 percent had a cool box where  
206 vaccines were stored. Many (61 percent) of the agro-shops did not have a power backup.  
207 Power backup consisted of manually operated standby generators (65 percent), solar  
208 power system (35 percent) and both the generator and solar system in a few (5 percent)  
209 agro-shops. The vaccines were mostly (94 percent) transported from wholesalers to the  
210 agro-shops in cool boxes or improvised vaccine packaging materials filled with ice packs  
211 to maintain low temperatures. The vaccines were then unpacked and stored in a  
212 refrigerator until they were sold. The thermostable vaccines in the plastic droppers were  
213 stored in cool boxes without ice packs or on shelves in the agro-shops. The most common  
214 challenge that the agro-shops encountered in their endeavor to safely handle and store  
215 the vaccines as per the best vaccine storage practices were recurrent power outages (62  
216 percent), high cost of electricity (62 percent) and long-distance to vaccine sources (33  
217 percent). Other constraints that were also mentioned were the high acquisition costs of  
218 standby generators and solar power systems, high cost of fuel and maintenance costs for  
219 standby generators, and lack of materials for packaging vaccines to customers. Some  
220 agro-shops had devised different ways to circumvent the frequent power interruptions by  
221 installing standby generators or power solar systems. However, such measures were  
222 observed more frequently in more established agro-shops (23 percent) that had been in

223 operation for more than 5 years, mostly located in the towns and larger trading centers in  
224 the County. Only a small fraction (11 percent) of agro-shops in more remote areas had  
225 power backup. Some agro-shops located in remote areas devised less costly practices,  
226 such as switching on and off the refrigerators to minimize power costs. These agro-shops  
227 indicated that they switched off the refrigerator at the close of business each day,  
228 transferred vaccines into ice-packed cool boxes for an overnight stay and returned them  
229 into the refrigerators the next morning. Other agro-shops restricted the sale of vaccines  
230 to specific days, usually market days, to minimize vaccine storage time and therefore the  
231 cost of having the refrigerator on for a long time. In such cases, vaccines were acquired  
232 a day before the market day, kept overnight and the entire stock sold off to customers the  
233 next day. In some instances, the sale of vaccines was restricted to specific hours, usually  
234 late in the afternoon and mostly after four o'clock when ambient temperatures were lower  
235 and only to customers who had thermos flasks to carry the vaccines. This practice was  
236 common in agro-shops located in the more remote areas away from major shopping  
237 centers.

## 238 **Vaccine handling and packaging practices during the sale**

239 Most (61 percent) of the agro-shops sold the vaccines in original vaccine vials as supplied  
240 by the manufacturers. A few shops (23 percent), especially those located in more remote  
241 areas, sold reconstituted vaccines. A common practice in the sale of thermolabile ND  
242 vaccines was for the customer to first specify the number of birds and their locality. The  
243 information was then used to determine the number of vaccine doses and adequacy of  
244 the packaging materials, in particular the quantity of ice. Vaccine brand, virus strain and  
245 expiry date on the vaccine label were not major considerations in the purchase of the

246 vaccines. It was observed that the small size of vaccine vials made it rather difficult for  
247 customers to read the information provided on the label. The vaccines were commonly  
248 packaged in improvised packaging materials that included, for example, used small  
249 plastic containers, polythene bags and small tins. The most common practice by agro-  
250 shops was to place the vaccine vial in a used non-absorbent packaging material mostly  
251 polythene paper, with a small block of ice which was then secured with cello tape and  
252 then wrapped in an opaque piece of paper. Most such shops provided a 10 ml plastic  
253 bottle of a diluent, a needle and a syringe alongside the vaccine for a 100-dose vial. In a  
254 few cases, vaccine vials were sold in a thermos flask that was filled with a few blocks of  
255 ice. An assessment of the adequacy of vaccine packaging revealed that the majority (88  
256 percent) of the agro-shops wrapped ND vaccine adequately for customers. The general  
257 advice given to the customers during the sale was to use the vaccine before the ice melts.  
258 The agro-shops that sold reconstituted vaccines to their customers dispensed them in  
259 syringes or small polythene bags which were wrapped in ice. The volume of the  
260 reconstituted vaccine that was dispensed to a customer was dependent on the number  
261 of chickens that the customer had indicated. Most of the agro-shops that sold  
262 reconstituted vaccines were located in more remote areas in the county. In some areas,  
263 vaccines were only sold to customers late in the afternoon, mostly after 4 o'clock when  
264 environmental temperatures were lower. Thermostable vaccines in plastic tubing were  
265 wrapped in paper and given to the customers without an ice pack.

## 266 **Discussion**

267 This study has highlighted vaccine handling practices that were used by agro-shops  
268 during the acquisition, storage and sale of Newcastle disease vaccines in the last mile

269 delivery. The agro-shops stocked vaccines that required cold chain temperatures to  
270 maintain potency. An assessment of the cold chain equipment in the agro-shops revealed  
271 that most of them (82 percent) had domestic refrigerators powered by an electricity grid.  
272 However, the existence of agro-shops with cool boxes and freezers only for vaccine  
273 storage casts doubt on the quality and potency of the vaccines that they sell to their  
274 customers as all the procured vaccines in the study area were indicated for storage of  
275 between +2°C and + 8°C. In many low-income countries, vaccine delivery systems have  
276 remained largely unchanged due to challenging contextual factors that have limited their  
277 ability to meet vaccination program requirements (22). Faced with the persistent  
278 challenge of frequent power outages and the rising cost of power, some of the agro-shops  
279 in the study area used different strategies to maintain cold storage conditions. Restricting  
280 the sale of vaccines to specific days and hours of sale could be regarded as good practice  
281 under these circumstances where the maintenance of the cold chain is difficult. However  
282 other practices, such as the transferring of vaccines in and out of refrigerators and  
283 switching refrigerators on and off to reduces power costs could inadvertently be exposing  
284 vaccines to heat and cold and may affect their quality and potency. For a vaccine to be  
285 useful in conferring protection against infections, it must be pure, safe, potent, and  
286 effective (19). This invariably depends on good vaccine handling practices. This study  
287 has revealed that there were few agro-shops (18 percent) that did not observe the basic  
288 requirements for safe storage and handling of vaccines. These shops did not have cold  
289 chain equipment and kept the vaccines outside the recommended cold chain  
290 temperatures. This practice compromises the quality and potency of ND vaccines and  
291 undermines the objectives of vaccination. The fact that such agro-shops were located in

292 the deeper rural areas may suggest that they could be operating away from the radar of  
293 regulators who are by law required to ensure that all veterinary products are stored under  
294 the right conditions for quality and safety.

295 The risk of vaccine quality deterioration is perhaps greatest in the last mile delivery as  
296 vaccines move from agro-shops to farms where they are administered to animals.  
297 Vaccines are extremely vulnerable to spoilage when they leave refrigerators as they  
298 become more exposed to high temperatures and light. Therefore, the way the vaccine  
299 vials are packaged for customers at the point of sale is critical. It is generally  
300 recommended that poultry vaccines are carried in portable insulated carriers (cool boxes,  
301 vaccine carriers and coolers) with frozen ice packs or locally available packaging  
302 materials that can maintain cold chain vaccine temperatures (30 as they move from  
303 refrigerator storage to farms for vaccination. An assessment of the adequacy of vaccine  
304 packaging materials by this study showed that most agro-shops (88 percent) adequately  
305 packaged the ND vaccine with sufficient quantities of ice in a non-absorbent material  
306 which was wrapped in an opaque piece of paper to protect it from light. The practice of  
307 asking customers where they came from by some agro-shops before packaging the  
308 vaccines to determine the adequacy of packing materials and in some cases limiting the  
309 sale of vaccines only to customers with thermos flasks are generally good practices that  
310 can help maintain vaccine quality and potency.

311 The recommended cold chain temperatures for vaccine maintenance globally is between  
312 2°C and 8°C (31,32). It is generally recommended that vaccines should be stored in their  
313 original packages and, for lyophilized vaccines, to only be reconstituted when needed. In  
314 this study, it was found that some agro-shops were reconstituting vaccines and drawing

315 them into syringes for sale to customers. Reconstituted vaccines are more sensitive than  
316 non-reconstituted vaccines and are at a higher risk of bacterial contamination and  
317 overgrowth if the syringes are left or not administered for prolonged periods. The practice  
318 of selling reconstituted vaccines compromises the quality and potency of vaccines.  
319 Furthermore, the sale of reconstituted vaccines denies customers their right to product  
320 information and increases the risk of malpractices due to lack of product identity.

321 Thermostable I-2 ND vaccines were developed to reduce dependence on cold chains.  
322 The strain I-2 of ND vaccine has many advantages that include thermostability, easy  
323 administration by various routes, such as drinking, eye drop, and mixing with food, and  
324 providing good protection against the disease (33). The vaccines have been  
325 recommended for use in village chicken as they can remain stable and potent outside the  
326 recommended cold chain temperatures for a considerable time. However, these vaccines  
327 were not widely available as the results of this study show. The most common type of  
328 vaccines found in the agro-shops in this study were the thermolabile Lasota types despite  
329 the fact they were relatively more expensive and require more stringent cold chain  
330 conditions.

331 Guidelines and best practices in the handling of veterinary vaccines, including the  
332 Newcastle disease vaccine, have been published and are readily available (30). However,  
333 some of these may have limited application in resource-poor settings, as suggested by  
334 the results of this study. For most agro-shops in rural areas, providing quality and potent  
335 poultry vaccines to customers, the majority of whom are smallholder farmers, in an  
336 environment that is characterized by frequent power outages and escalating costs of  
337 electricity is no easy task. As the results of this study show, most agro-shops had cold

338 chain equipment for the storage of vaccines. While this is essential, it does not  
339 automatically result in optimal vaccine storage conditions as improperly maintained or  
340 outdated refrigeration equipment, poor compliance with cold-chain procedures, and  
341 inadequate temperature monitoring could affect cold storage conditions (18).

## 342 **Conclusion**

343 The results of the present study have revealed several practices in the last mile,  
344 transportation, storage and sale of vaccines by agro-shops. Faced with long-standing  
345 challenges in the maintenance of cold chains, the agro-shops devised several practices  
346 that may be affecting the quality and potency of vaccines in one way or another. These  
347 practices include restricting the sale of vaccines to late hours of the afternoon when the  
348 ambient temperature is lower and periodically switching off the fridge and restricting the  
349 hours of sale of vaccines to minimize storage costs. However, it remains unclear how  
350 such practices affect vaccine quality and potency. Therefore, further research could  
351 provide more information on the effects of such practices on vaccine potency.

352 Thermostable vaccine formulations can leave cold-chain conditions for a comparatively  
353 longer time while retaining potency. Thermostability of vaccines is a desirable trait in  
354 resource-poor settings, particularly where maintenance of cold chain is difficult. However,  
355 as the results of this study showed, thermo-stable vaccines were not widely available in  
356 the agro-shops. It has been suggested that where there is an existing, effective, low-cost  
357 vaccine in routine use, it is unlikely that manufacturers would change their formulations  
358 or manufacturing processes for an established low-profit-margin vaccine (34). However,



359 further research could provide more information for the apparent preference of lyophilized  
360 vaccines which require more stringent cold chain conditions.

361 Agro-shops are a critical link in the delivery of Newcastle disease and other poultry  
362 vaccines to smallholder farmers in rural areas. Proper transport, storage, and handling of  
363 vaccines are issues that are frequently overlooked when creating or implementing  
364 vaccine protocols and vaccination programs. Between the time a vaccine leaves the  
365 manufacturer's plant and the time it is injected into an animal, there are many stages for  
366 inadvertent contamination or inactivation. By being aware of these potential "weak points"  
367 in a vaccine protocol, agro-shops can help ensure that vaccines are not rendered  
368 ineffective because of improper handling. Good practices to maintain proper vaccine  
369 storage and handling can ensure that the full benefit of immunization is realized.

### 370 **Acknowledgment**

371 The authors would like to acknowledge all the agro-shops and enumerators that  
372 participated in the study and the County Government of Bungoma for their help and  
373 cooperation.

### 374 **References**

- 375 1. Peters AR, Domingue G, Olorunshola ID, Thevasagayam SJ, Musumba B,  
376 Wekundah JM. A survey of rural farming practice in two provinces in Kenya. 2.  
377 Livestock disease recognition, prevention and treatment. Foot. 2012;17:10–0.

- 378 2. Bessell PR, Kushwaha P, Mosha R, Woolley R, Al-Riyami L, Gammon N. Assessing  
379 the impact of a novel strategy for delivering animal health interventions to  
380 smallholder farmers. *Prev Vet Med.* 2017;147:108–16.
- 381 3. Tu TD, Van Phuc K, Dinh NTK, Quoc DN, Spradbrow PB. Vietnamese trials with a  
382 thermostable Newcastle disease vaccine (strain I2) in experimental and village  
383 chickens. *Prev Vet Med.* 1998;34(2–3):205–14.
- 384 4. Alders R, Spradbrow P. Controlling Newcastle disease in village chickens: a field  
385 manual. Australian Centre for International Agricultural Research (ACIAR); 2001.
- 386 5. Njue SW, Kasiiti JL, Gacheru SG. Assessing the economic impact of commercial  
387 poultry feeds supplementation and vaccination against Newcastle disease in local  
388 chickens, in Kenya. *Improv Farmyard Poult Prod Afr Interv Their Econ Assess.*  
389 2006;116.
- 390 6. Mayers J, Mansfield KL, Brown IH. The role of vaccination in risk mitigation and  
391 control of Newcastle disease in poultry. *Vaccine.* 2017;35(44):5974–80.
- 392 7. Lindahl JF, Young J, Wyatt A, Young M, Alders R, Bagnol B, et al. Do vaccination  
393 interventions have effects? A study on how poultry vaccination interventions change  
394 smallholder farmer knowledge, attitudes, and practice in villages in Kenya and  
395 Tanzania. *Trop Anim Health Prod* [Internet]. 2019 Jan 1 [cited 2020 Nov  
396 24];51(1):213–20. Available from: <https://doi.org/10.1007/s11250-018-1679-3>
- 397 8. Lwapa FEI, Masumu JM, Matala FM, Mukoko FN, Mbao V, Moula N, et al.  
398 Participatory assessment of paid vaccination campaigns for village chickens against

- 399 Newcastle disease in Kongo Central province. *Prev Vet Med* [Internet]. 2019 Nov 15  
400 [cited 2020 Nov 24];172:104783. Available from:  
401 <http://www.sciencedirect.com/science/article/pii/S0167587719301886>
- 402 9. Campbell ZA, Thumbi SM, Marsh TL, Quinlan MB, Shirima GM, Palmer GH. Why  
403 isn't everyone using the thermotolerant vaccine? Preferences for Newcastle disease  
404 vaccines by chicken-owning households in Tanzania. *PLOS ONE* [Internet]. 2019  
405 Aug 15 [cited 2020 Nov 24];14(8):e0220963. Available from:  
406 <https://journals.plos.org/plosone/article?id=10.1371/journal.pone.0220963>
- 407 10. Alders RG. Making Newcastle disease vaccines available at village level. *Vet Rec.*  
408 2014;174(20):502–3.
- 409 11. Campbell ZA, Marsh TL, Mpolya EA, Thumbi SM, Palmer GH. Newcastle disease  
410 vaccine adoption by smallholder households in Tanzania: Identifying determinants  
411 and barriers. *PloS One*. 2018;13(10):e0206058.
- 412 12. Bagnol B. Gender issues in small-scale family poultry production: experiences with  
413 Newcastle Disease and Highly Pathogenic Avian Influenza control. *Worlds Poult Sci*  
414 *J.* 2009;65(2):231–40.
- 415 13. Foster HA, Chitukuro HR, Tuppa E, Mwanjala T, Kusila C. Thermostable Newcastle  
416 disease vaccines in Tanzania. *Vet Microbiol.* 1999;68(1–2):127–30.
- 417 14. Komba EV, Mbyuzi AO, Mulangila RC. Adoption of I2 vaccine in immunization of  
418 village chickens against Newcastle disease virus in Southern Tanzania: Immune  
419 status of farmer vaccinated birds. *J Agric Sci.* 2012;4(4):23–8.

- 420 15. Annapragada A, Borgerson C, Iams S, Ravelomanantsoa MA, Crawford GC, Helin  
421 M, et al. Modeling the impact of Newcastle disease virus vaccinations on chicken  
422 production systems in Northeastern Madagascar. *Front Vet Sci.* 2019;6:305.
- 423 16. Dumas SE, Lungu L, Mulambya N, Daka W, McDonald E, Steubing E, et al.  
424 Sustainable smallholder poultry interventions to promote food security and social,  
425 agricultural, and ecological resilience in the Luangwa Valley, Zambia. *Food Secur.*  
426 2016;8(3):507–20.
- 427 17. World HO. Temperature sensitivity of vaccines [Internet]. World Health Organization;  
428 Available from: <https://apps.who.int/iris/handle/10665/69387>
- 429 18. Wirkas T, Toikilik S, Miller N, Morgan C, Clemments JC. A vaccine cold chain  
430 freezing study in PNG highlights technology needs for hot climate countries. *Vaccine.*  
431 2007 Jan 25;25(4):691–7.
- 432 19. OIE. Manual of Diagnostic Tests and Vaccines for Terrestrial Animals 2019. Chapter  
433 1.1.8. Principles of Veterinary Vaccine Production;
- 434 20. Karp CL, Lans D, Esparza J, Edson EB, Owen KE, Wilson CB, et al. Evaluating the  
435 value proposition for improving vaccine thermostability to increase vaccine impact in  
436 low and middle-income countries. *Vaccine.* 2015 Jul 9;33(30):3471–9.
- 437 21. Norman BA, Nourollahi S, Chen S-I, Brown ST, Claypool EG, Connor DL, et al. A  
438 passive cold storage device economic model to evaluate selected immunization  
439 location scenarios. *Vaccine.* 2013 Oct 25;31(45):5232–8.

- 440 22. Ashok A, Brison M, LeTallec Y. Improving cold chain systems: Challenges and  
441 solutions. *Vaccine*. 2017 Apr 19;35(17):2217–23.
- 442 23. Guillermet E, Alfa DA, Gbodja R, Jaillard P. Professional changes induced by a  
443 redesigned immunization supply chain in the Comé Health Zone, Benin. *Vaccine*.  
444 2017 Apr 19;35(17):2189–94.
- 445 24. Lennon P, Atuhaire B, Yavari S, Sampath V, Mvundura M, Ramanathan N, et al.  
446 Root cause analysis underscores the importance of understanding, addressing, and  
447 communicating cold chain equipment failures to improve equipment performance.  
448 *Vaccine*. 2017 Apr 19;35(17):2198–202.
- 449 25. Comes T, Sandvik KB, Walle BV de. Cold chains, interrupted: The use of technology  
450 and information for decisions that keep humanitarian vaccines cool. *J Humanit Logist*  
451 *Supply Chain Manag*. 2018 Apr 3;8(1).
- 452 26. Lemmens S, Decouttere C, Vandaele N, Bernuzzi M. A review of integrated supply  
453 chain network design models: Key issues for vaccine supply chains. *Chem Eng Res*  
454 *Des*. 2016;109:366–84.
- 455 27. Kristensen DD, Lorenson T, Bartholomew K, Villadiego S. Can thermostable  
456 vaccines help address cold-chain challenges? Results from stakeholder interviews  
457 in six low- and middle-income countries. *Vaccine*. 2016 Feb 10;34(7):899–904.
- 458 28. Terfa ZG, Garikipati S, Kassie G, Bettridge JM, Christley RM. Eliciting preferences  
459 for attributes of Newcastle disease vaccination programmes for village poultry in  
460 Ethiopia. *Prev Vet Med*. 2018;158:146–51.

- 461 29. Kenya National Bureau of Statistics. Volume iv: Distribution of population by socio-  
462 economic characteristics. Vol. 4. Kenya National Bureau of Statistics; 2019.
- 463 30. Young M, Costa R, Shirima G, Lobo Q, Tounkara K, Farrell P, et al. Veterinary Cold  
464 Chain Manual: ensuring effective vaccines. ACIAR Monograph No. 165a. Australian  
465 Centre for International Agricultural Research: Canberra; 2015.
- 466 31. Techathawat S, Varinsathien P, Rasdjarmrearnsook A, Tharmaphornpilas P.  
467 Exposure to heat and freezing in the vaccine cold chain in Thailand. *Vaccine*.  
468 2007;25(7):1328–33.
- 469 32. Kumru OS, Joshi SB, Smith DE, Middaugh CR, Prusik T, Volkin DB. Vaccine  
470 instability in the cold chain: Mechanisms, analysis and formulation strategies.  
471 *Biologicals*. 2014;42(5):237–59.
- 472 33. Wambura PN. Oral vaccination of chickens against Newcastle disease with I-2  
473 vaccine coated on oiled rice. *Trop Anim Health Prod*. 2009;41(2):205–8.
- 474 34. Chen D, Kristensen D. Opportunities and challenges of developing thermostable  
475 vaccines. *Expert Rev Vaccines*. 2009;8(5):547–57.
- 476

bioRxiv preprint doi: <https://doi.org/10.1101/2021.02.19.431949>; this version posted February 19, 2021. The copyright holder for this preprint (which was not certified by peer review) is the author/funder, who has granted bioRxiv a license to display the preprint in perpetuity. It is made available under aCC-BY 4.0 International license.

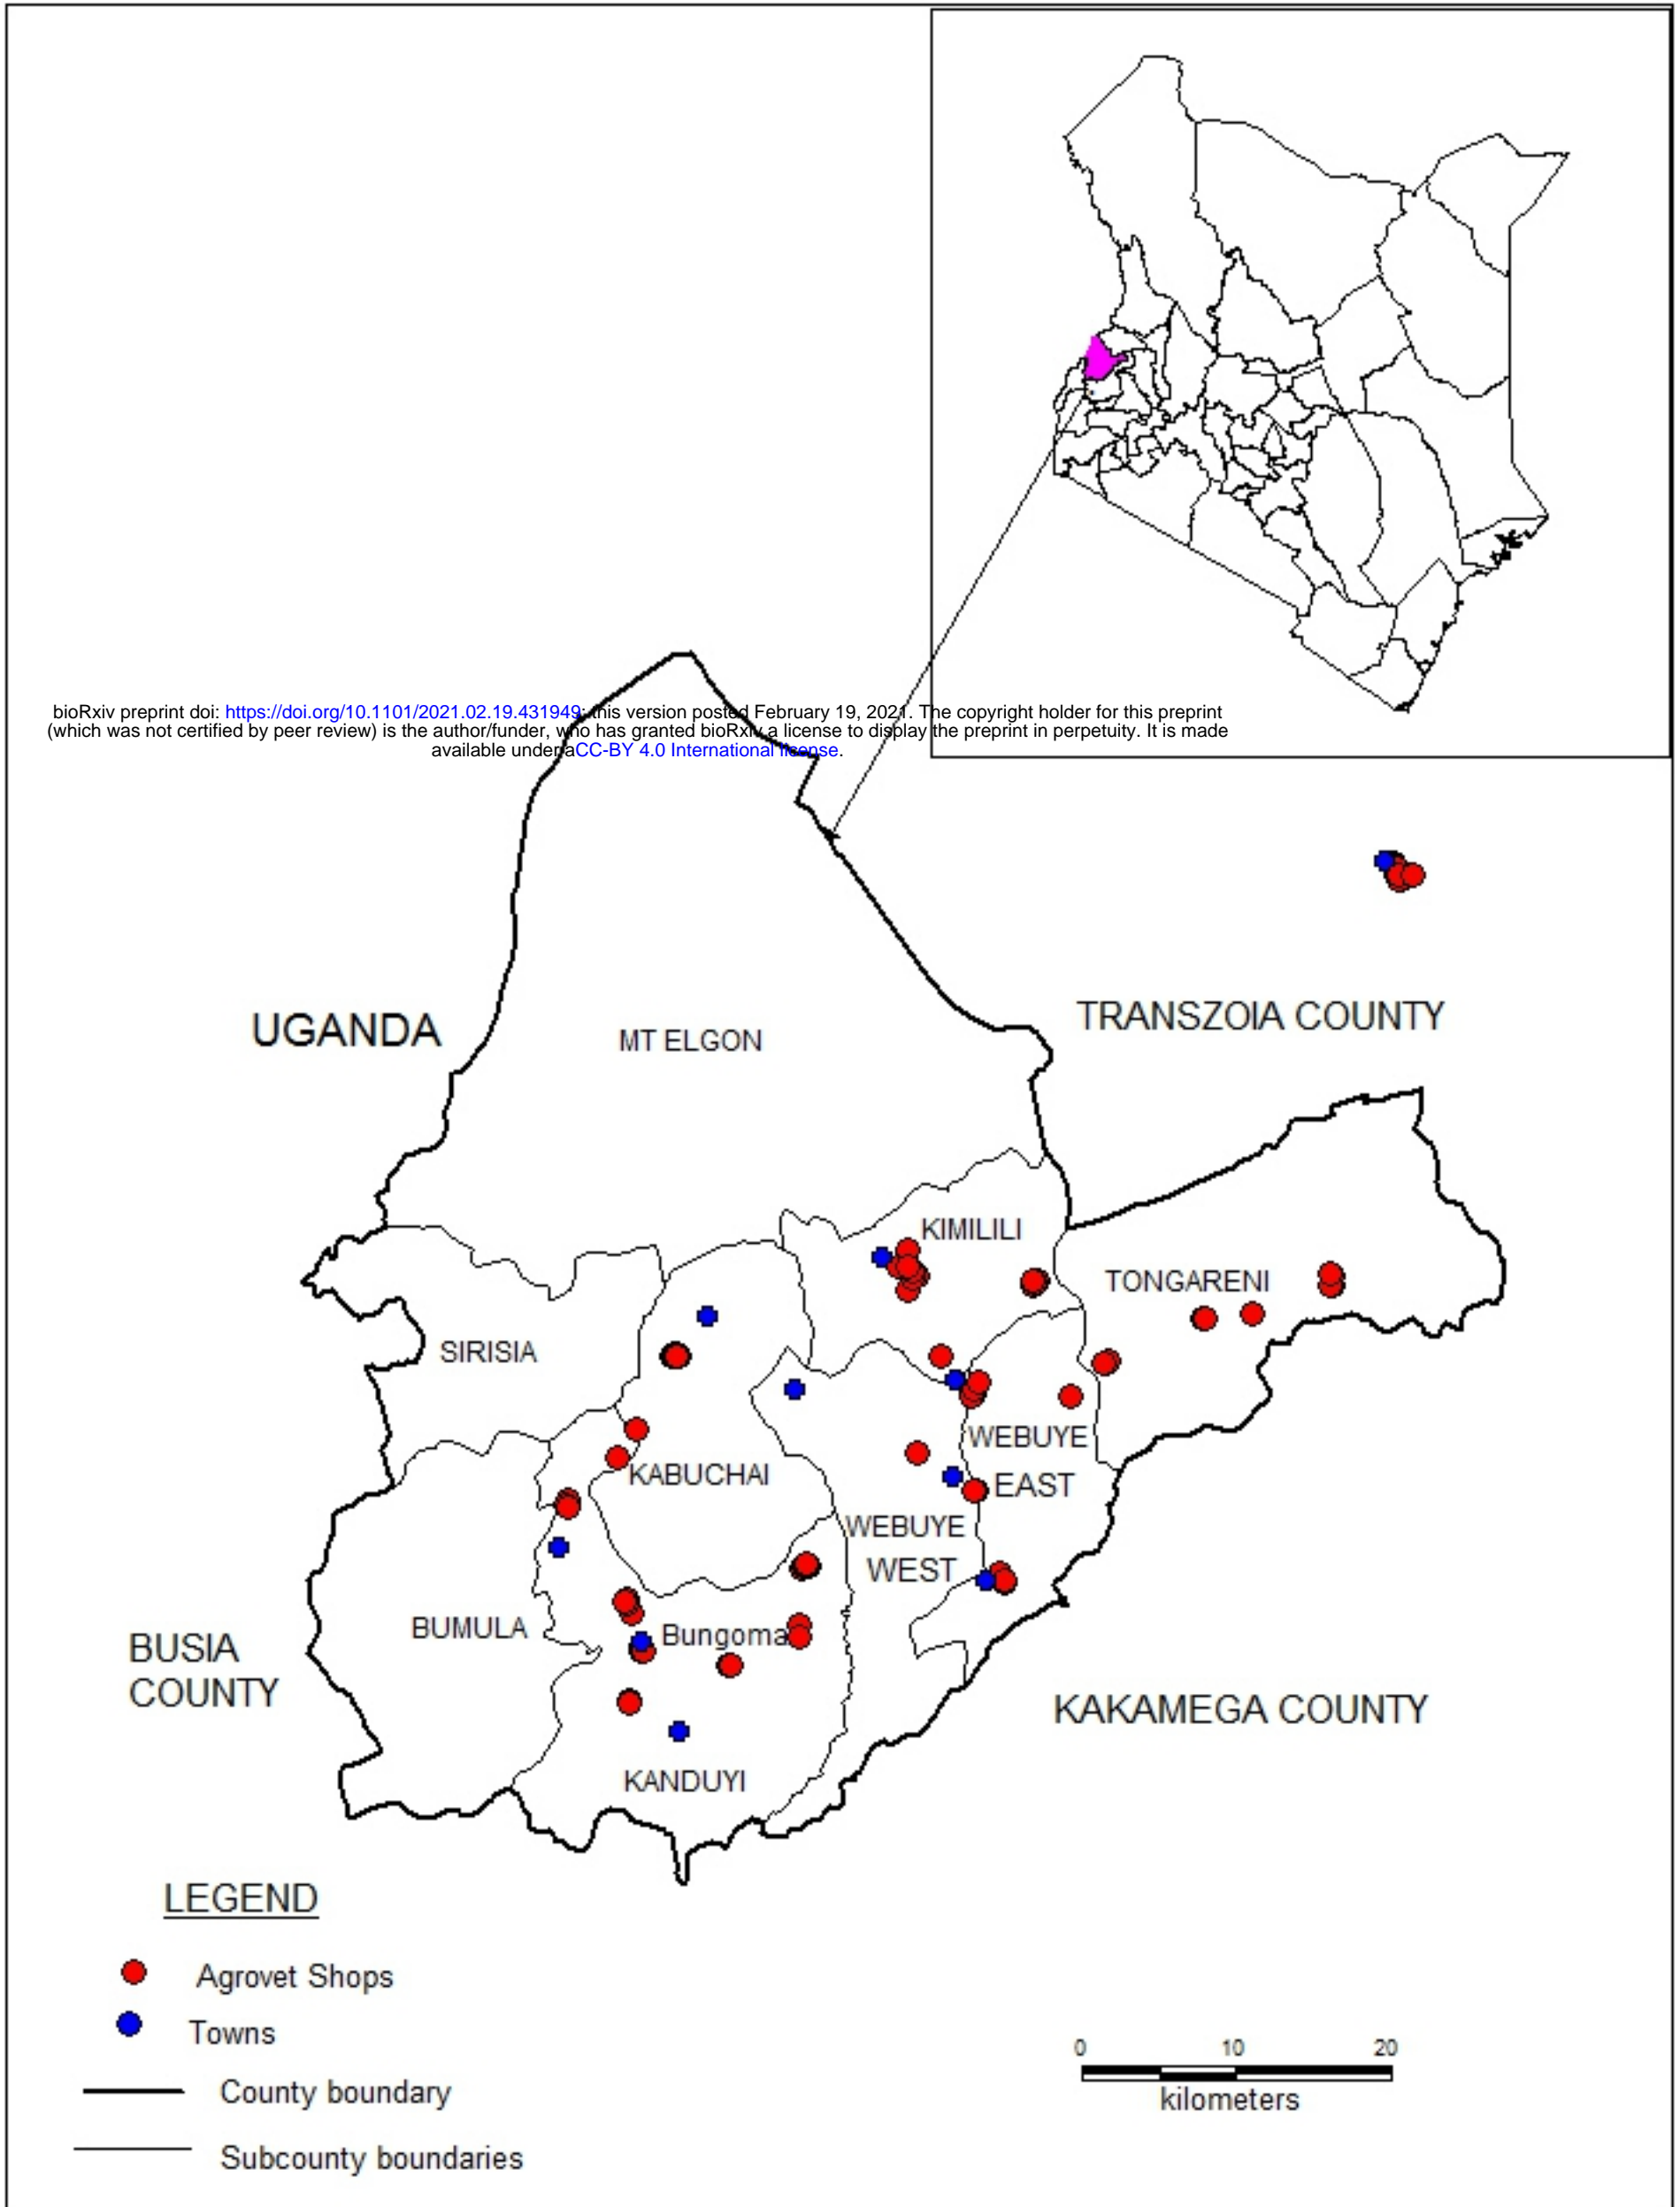

Fig 1
